# Supplementary material for: Palmitic Acid Induced a Long-Lasting Lipotoxic Insult in Human Retinal Pigment Epithelial Cells, which Is Partially Counteracted by TRAIL
Source: MDPI journal article supplement (doi:10.3390/antiox11122340), 2022-11-26
Supplement: s1 [file s1]

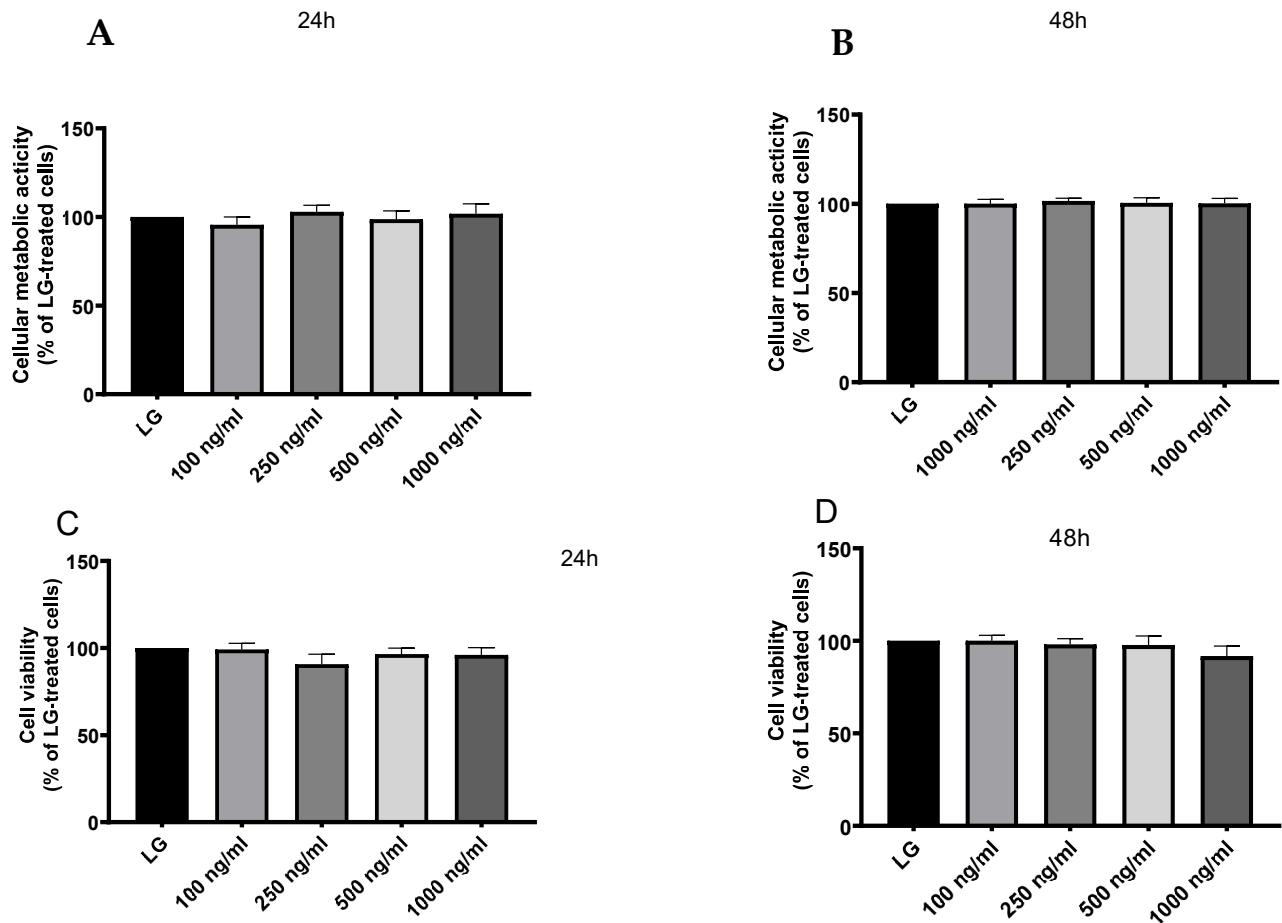

**Supplementary Figure S1.** Cellular metabolic activity and viability in response to increasing TRAIL concentrations: 100, 250, 500 and 1000 ng/ml. ARPE-19 cell metabolic activity (A, B) and cell viability (C, D) assessed after 24 (A, C) and 48 hours (B, D) incubation with increasing TRAIL concentrations. Data are expressed as mean  $\pm$  SEM of two independent experiments, each performed in triplicate.
